# Supplementary material for: Impact of High-Pressure Homogenization Parameters on Physicochemical Characteristics, Bioactive Compounds Content, and Antioxidant Capacity of Blackcurrant Juice
Source: PubMed Central journal article supplement (PMC8004621; doi:10.3390/molecules26061802), 2021-03-23
Supplement: molecules-26-01802-s001.pdf [file molecules-26-01802-s001.pdf]

Supplementary materials

# Impact of High-Pressure Homogenization Parameters on Physicochemical Characteristics, Bioactive Compounds Content and Antioxidant Capacity of Blackcurrant Juice

Bartosz Kruszewski <sup>1,\*</sup>, Katarzyna Zawada <sup>2</sup> and Piotr Karpiński <sup>3</sup>

<sup>1</sup> Department of Food Technology and Assessment, Institute of Food Sciences, Warsaw University of Life Sciences - SGGW, Nowoursynowska 159 C, 02-776 Warsaw, Poland

<sup>2</sup> Department of Physical Chemistry, Faculty of Pharmacy with the Laboratory Medicine Division, Medical University of Warsaw, Banacha 1, 02-097 Warsaw, Poland; kzawada@wum.edu.pl

<sup>3</sup> Faculty of Computer Science and Food Science, Lomza State University of Applied Sciences (PWSiP), Akademicka 14, 18-400 Łomża, Poland. pkarpinski@pwsip.edu.pl

\* Correspondence: bartosz\_kruszewski@sggw.edu.pl; Tel.: +48 22 593 75 20

**Table S1.** L\*, a\*, b\* colour values of cloudy blackcurrant juice samples treated with high-pressure homogenization or pasteurization.

| Treatment                   |              |                  | L*                         | a*                         | b*                          |
|-----------------------------|--------------|------------------|----------------------------|----------------------------|-----------------------------|
| Raw Juice                   |              |                  | 11.49 ± 0.01 <sup>a</sup>  | 43.36 ± 0.34 <sup>j</sup>  | 19.90 ± 0.17 <sup>a</sup>   |
| Pasteurization 90 °C, 1 min |              |                  | 13.28 ± 0.04 <sup>n</sup>  | 40.91 ± 0.03 <sup>ab</sup> | 22.90 ± 0.04 <sup>i</sup>   |
| Homogenization              |              |                  |                            |                            |                             |
| Temp. °C                    | Pressure MPa | Number of Passes |                            |                            |                             |
| 4                           | 50           | 1                | 11.64 ± 0.02 <sup>b</sup>  | 43.06 ± 0.03 <sup>i</sup>  | 20.26 ± 0.07 <sup>b</sup>   |
|                             |              | 3                | 12.03 ± 0.02 <sup>ef</sup> | 42.26 ± 0.02 <sup>fg</sup> | 20.54 ± 0.04 <sup>cde</sup> |
|                             |              | 5                | 12.44 ± 0.06 <sup>i</sup>  | 41.88 ± 0.04 <sup>de</sup> | 20.20 ± 0.05 <sup>b</sup>   |
|                             | 150          | 1                | 11.74 ± 0.01 <sup>c</sup>  | 42.72 ± 0.07 <sup>h</sup>  | 20.45 ± 0.07 <sup>c</sup>   |
|                             |              | 3                | 12.06 ± 0.03 <sup>f</sup>  | 42.23 ± 0.02 <sup>fg</sup> | 20.55 ± 0.03 <sup>cde</sup> |
|                             |              | 5                | 12.32 ± 0.02 <sup>h</sup>  | 42.33 ± 0.03 <sup>g</sup>  | 20.48 ± 0.04 <sup>cd</sup>  |
|                             | 220          | 1                | 11.74 ± 0.03 <sup>c</sup>  | 42.94 ± 0.04 <sup>hi</sup> | 20.52 ± 0.07 <sup>cde</sup> |
|                             |              | 3                | 12.18 ± 0.05 <sup>g</sup>  | 42.34 ± 0.01 <sup>g</sup>  | 20.66 ± 0.01 <sup>e</sup>   |
|                             |              | 5                | 12.56 ± 0.04 <sup>j</sup>  | 41.64 ± 0.04 <sup>c</sup>  | 21.03 ± 0.03 <sup>f</sup>   |
| 20                          | 50           | 1                | 12.43 ± 0.02 <sup>i</sup>  | 42.08 ± 0.03 <sup>ef</sup> | 20.54 ± 0.03 <sup>cde</sup> |
|                             |              | 3                | 12.80 ± 0.08 <sup>k</sup>  | 41.69 ± 0.05 <sup>cd</sup> | 21.05 ± 0.06 <sup>f</sup>   |
|                             |              | 5                | 13.06 ± 0.06 <sup>lm</sup> | 41.68 ± 0.01 <sup>cd</sup> | 21.32 ± 0.07 <sup>g</sup>   |
|                             | 150          | 1                | 11.86 ± 0.03 <sup>d</sup>  | 42.83 ± 0.05 <sup>hi</sup> | 20.60 ± 0.05 <sup>cde</sup> |
|                             |              | 3                | 11.93 ± 0.02 <sup>de</sup> | 42.30 ± 0.02 <sup>fg</sup> | 20.56 ± 0.07 <sup>cde</sup> |
|                             |              | 5                | 12.53 ± 0.01 <sup>ij</sup> | 41.6 ± 0.03 <sup>e</sup>   | 20.62 ± 0.05 <sup>de</sup>  |
|                             | 220          | 1                | 13.15 ± 0.07 <sup>m</sup>  | 41.50 ± 0.06 <sup>c</sup>  | 21.28 ± 0.06 <sup>g</sup>   |
|                             |              | 3                | 13.15 ± 0.05 <sup>m</sup>  | 41.14 ± 0.04 <sup>b</sup>  | 21.32 ± 0.03 <sup>g</sup>   |
|                             |              | 5                | 13.03 ± 0.01 <sup>l</sup>  | 40.90 ± 0.06 <sup>a</sup>  | 21.53 ± 0.05 <sup>h</sup>   |

Different letters (a–l) in columns mean statistically significant differences at the level of  $p < 0.05$ .
